# Supplementary material for: Facile synthesis of layered Co(OH)2 deposited g-C3N4 for activating peroxymonosulfate to degrade organic pollutants
Source: Royal Society of Chemistry journal article supplement (doi:10.1039/d1nj02445k), 2021-01-01
Supplement: d1nj02445k1.pdf [file d1nj02445k1.pdf]

## Supporting Information

### **Facile synthesis of layered $\text{Co}(\text{OH})_2$ deposited g- $\text{C}_3\text{N}_4$ for activating peroxymonosulfate to degrade organic pollutants**

Yingxue Zhang<sup>a</sup>, Jianyu Qu<sup>a</sup>, Fangjun Ding<sup>b</sup>, Yujiao Kong<sup>a</sup>, Xiurong Su<sup>a,\*</sup> and Xingliang Xu<sup>a,c,\*</sup>

<sup>a</sup>College of Chemistry and Material Science, Shandong Agricultural University, 271018 Taian, Shandong, People's Republic of China.

<sup>b</sup>Shandong Agricultural University Fertilizer Sci & Tec Co., Ltd.

271600 Taian, Shandong, People's Republic of China.

<sup>c</sup> Foshan (Southern China) Institute for New Materials, Foshan 528200, Guangdong, China.

\*Corresponding author: Xiurong Su: xrsu@sdau.edu.cn

Xingliang Xu: xxlsdau@163.com

| No. | Details                                                                                                                                                                                                                            | Page |
|-----|------------------------------------------------------------------------------------------------------------------------------------------------------------------------------------------------------------------------------------|------|
| 1   | <b>Figure S1.</b> N <sub>2</sub> sorption isotherms curve of g-C <sub>3</sub> N <sub>4</sub> , Co(OH) <sub>2</sub> and Co(OH) <sub>2</sub> /g-C <sub>3</sub> N <sub>4</sub> .                                                      | 3    |
| 2   | <b>Table S1.</b> BET surface area and pore volume of g-C <sub>3</sub> N <sub>4</sub> , Co(OH) <sub>2</sub> and Co(OH) <sub>2</sub> /g-C <sub>3</sub> N <sub>4</sub> .                                                              | 3    |
| 3   | <b>Figure S2.</b> Zeta potential of g-C <sub>3</sub> N <sub>4</sub> , Co(OH) <sub>2</sub> and Co(OH) <sub>2</sub> /g-C <sub>3</sub> N <sub>4</sub> at different pH.                                                                | 4    |
| 4   | <b>Figure S3.</b> The electrochemical impedance spectroscopy of g-C <sub>3</sub> N <sub>4</sub> , Co(OH) <sub>2</sub> , and Co(OH) <sub>2</sub> /g-C <sub>3</sub> N <sub>4</sub> .                                                 | 4    |
| 5   | <b>Figure S4.</b> (a) The RhB removal efficiency and (b) Kinetic constants of RhB removal in different systems.                                                                                                                    | 5    |
| 6   | <b>Figure S5.</b> Residual PMS during the reaction system.                                                                                                                                                                         | 5    |
| 7   | <b>Figure S6.</b> Kinetic curves of RhB removal at different reaction conditions. (a) PMS dosage, (b) Co(OH) <sub>2</sub> /g-C <sub>3</sub> N <sub>4</sub> dosage, (c) initial pH value, (d) initial concentration on RhB removal. | 6    |
| 8   | <b>Figure S7.</b> The TOC removal effect of Co(OH) <sub>2</sub> /g-C <sub>3</sub> N <sub>4</sub> over time on RhB.                                                                                                                 | 7    |
| 9   | <b>Figure S8.</b> (a) The RhB removal efficiency and (b) Kinetic constants of RhB removal in the different initial RhB concentration.                                                                                              | 7    |
| 10  | <b>Figure S9.</b> The degradation of various emerging organic pollutants.                                                                                                                                                          | 8    |
| 11  | <b>Figure S10.</b> Degradation efficiency of RhB after 3 cycles.                                                                                                                                                                   | 8    |
| 12  | <b>Figure S11.</b> The XRD of Co(OH) <sub>2</sub> /g-C <sub>3</sub> N <sub>4</sub> after using PMS activation.                                                                                                                     | 9    |
| 13  | <b>Figure S12.</b> XPS of Co 2p for Co(OH) <sub>2</sub> /g-C <sub>3</sub> N <sub>4</sub> after using PMS activation.                                                                                                               | 9    |
| 14  | <b>Figure S13.</b> The extracted ion chromatography(EIC) of phthalic acid.                                                                                                                                                         | 10   |
| 15  | <b>Figure S14.</b> The mass spectrogram of phthalic acid.                                                                                                                                                                          | 10   |
| 16  | <b>Figure S15.</b> The extracted ion chromatography (EIC) of phthalic acid.                                                                                                                                                        | 11   |
| 17  | <b>Figure S16.</b> The mass spectrogram of phthalic acid.                                                                                                                                                                          | 11   |
| 18  | <b>Figure S17.</b> The intermediates obtained by liquid mass spectrometry.                                                                                                                                                         | 12   |
| 19  | <b>Table S2.</b> Comparison of Co(OH) <sub>2</sub> /g-C <sub>3</sub> N <sub>4</sub> with other published materials for PMS activation.                                                                                             | 12   |

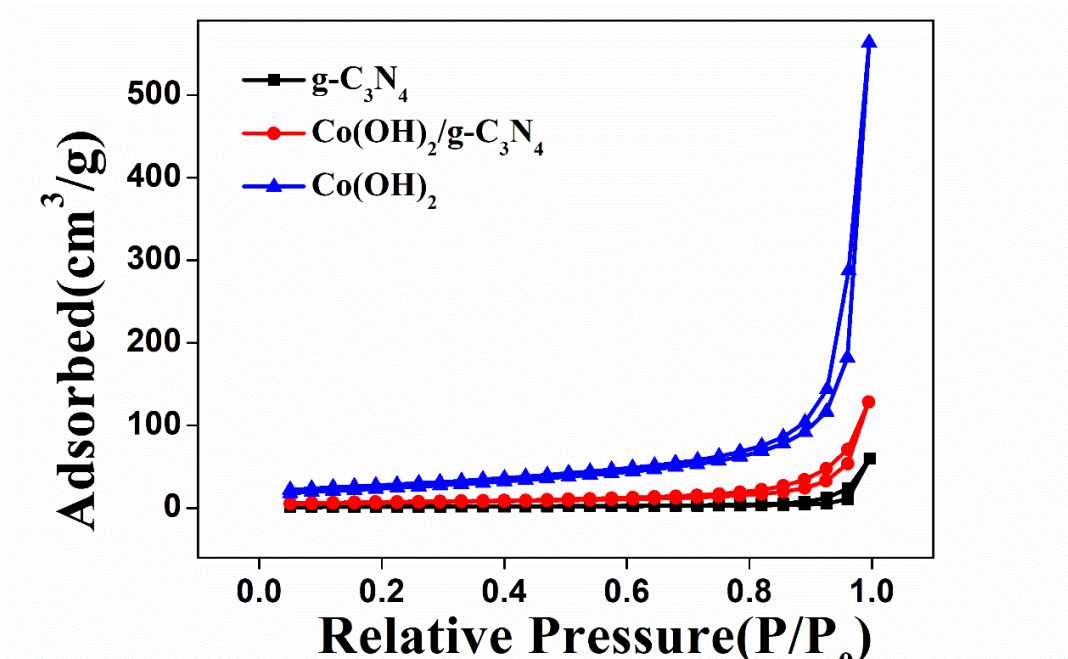

Figure S1. N<sub>2</sub> sorption isotherms curve of g-C<sub>3</sub>N<sub>4</sub>, Co(OH)<sub>2</sub> and Co(OH)<sub>2</sub>/g-C<sub>3</sub>N<sub>4</sub>

Table S1. BET surface area and pore volume of g-C<sub>3</sub>N<sub>4</sub>, Co(OH)<sub>2</sub> and Co(OH)<sub>2</sub>/g-C<sub>3</sub>N<sub>4</sub>.

| Catalyst                                             | S <sub>BET</sub> (m <sup>2</sup> /g) | pore volum (cm <sup>3</sup> /g) |
|------------------------------------------------------|--------------------------------------|---------------------------------|
| Co(OH) <sub>2</sub>                                  | 85.5085                              | 0.170488                        |
| g-C <sub>3</sub> N <sub>4</sub>                      | 5.1232                               | 0.013123                        |
| Co(OH) <sub>2</sub> /g-C <sub>3</sub> N <sub>4</sub> | 22.8336                              | 0.057799                        |

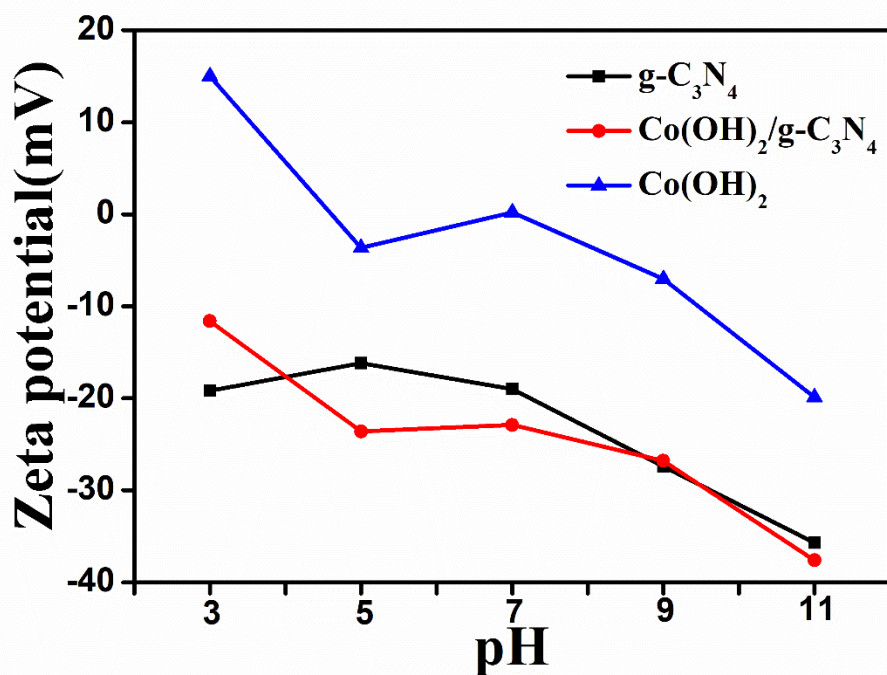

Figure S2. Zeta potential of g-C<sub>3</sub>N<sub>4</sub>, Co(OH)<sub>2</sub> and Co(OH)<sub>2</sub>/ g-C<sub>3</sub>N<sub>4</sub> at different pH.

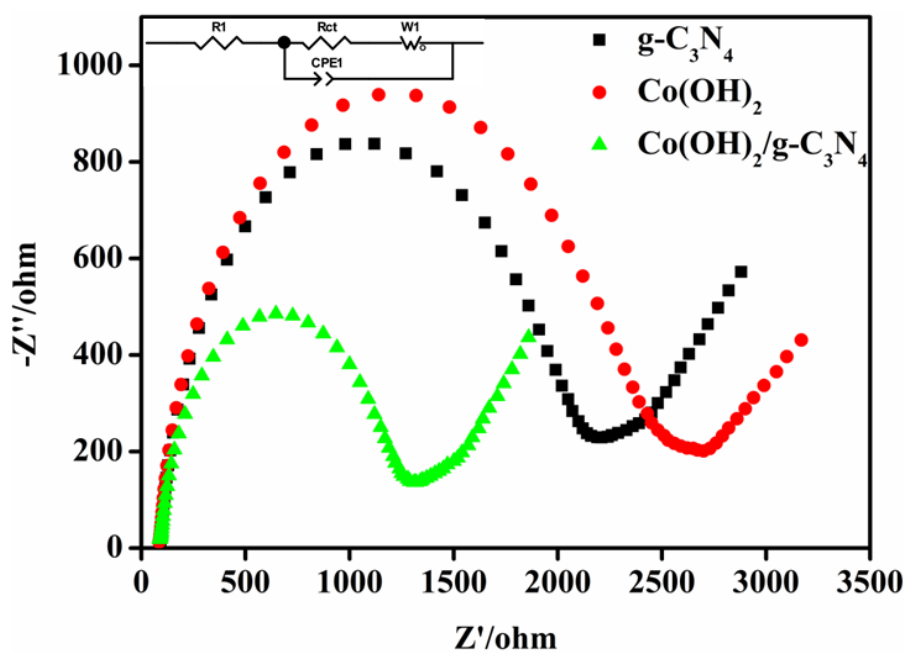

Figure S3. The electrochemical impedance spectroscopy of g-C<sub>3</sub>N<sub>4</sub>, Co(OH)<sub>2</sub>, and Co(OH)<sub>2</sub>/ g-C<sub>3</sub>N<sub>4</sub>.

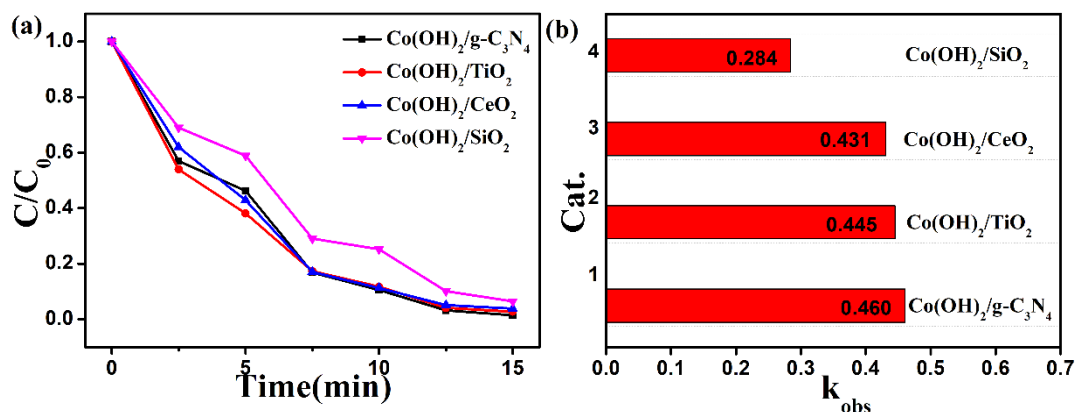

Figure S4. (a) The RhB removal efficiency and (b) Kinetic constants of RhB removal in different systems. Reaction conditions:  $V=100\text{mL}$ ,  $[\text{RhB}]_0 = 20.0\text{ mg/L}$ ,  $[\text{Cat.}]_0 = 0.15\text{ g/L}$ ,  $[\text{PMS}]_0 = 0.50\text{ g/L}$ , initial  $\text{pH} = 7$ .

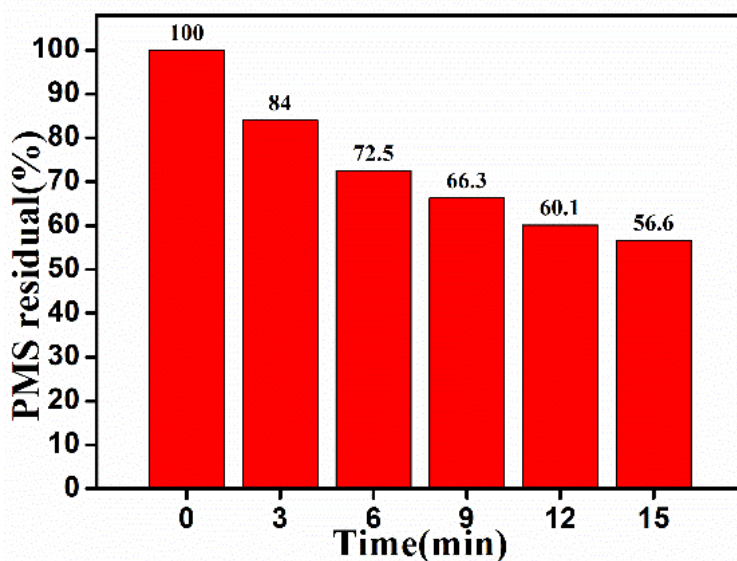

Figure S5. Residual PMS during the reaction system. Reaction conditions:  $V=100\text{mL}$ ,  $[\text{RhB}]_0 = 20.0\text{ mg/L}$ ,  $[\text{Cat.}]_0 = 0.15\text{ g/L}$ ,  $[\text{PMS}]_0 = 0.50\text{ g/L}$ , initial  $\text{pH} = 7$ .

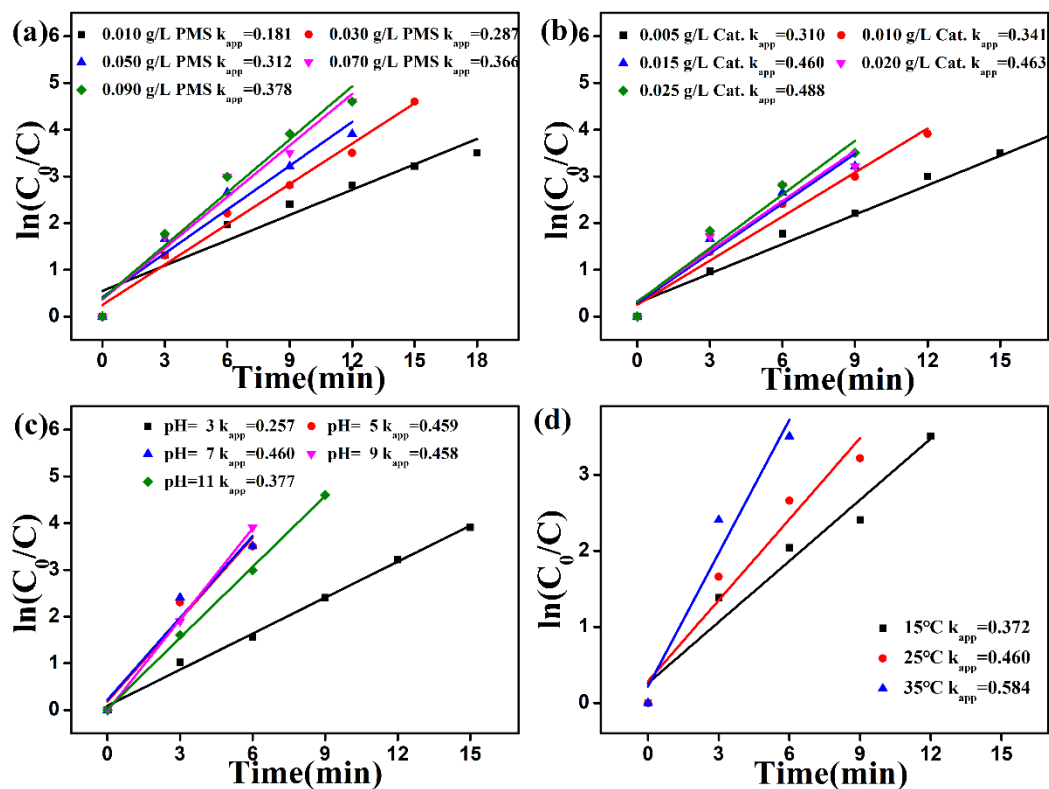

**Figure S6. Kinetic curves of RhB removal at different reaction conditions.(a) PMS dosage, (b)  $\text{Co(OH)}_2/\text{g-C}_3\text{N}_4$  dosage, (c) initial pH value, (d) reaction temperature. Reaction conditions:  $V=100\text{mL}$ ,  $[\text{RhB}]_0 = 20.0 \text{ mg/L}$ ,  $[\text{Co(OH)}_2/\text{g-C}_3\text{N}_4]_0 = 0.15 \text{ g/L}$  (except (a)),  $[\text{PMS}]_0 = 0.50 \text{ g/L}$  (except (b)), initial pH = 7 (except (c)).**

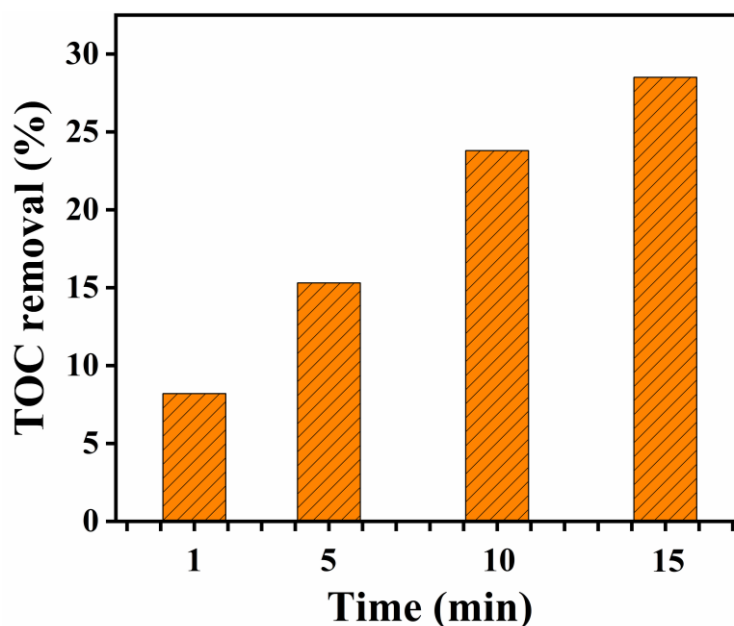

Figure S7. The TOC removal effect of  $\text{Co(OH)}_2/\text{g-C}_3\text{N}_4$  over time on RhB. Reaction conditions:  $V = 100 \text{ mL}$ ,  $[\text{RhB}]_0 = 20.0 \text{ mg/L}$ ,  $[\text{Co(OH)}_2/\text{g-C}_3\text{N}_4]_0 = 0.15 \text{ g/L}$ ,  $[\text{PMS}]_0 = 0.50 \text{ g/L}$ , initial  $\text{pH} = 7.0$ .

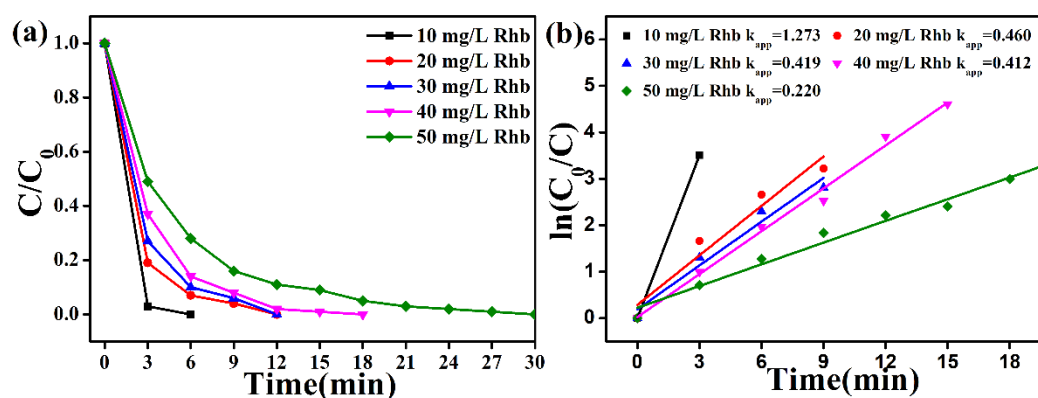

Figure S8. (a) The RhB removal efficiency and (b) Kinetic constants of RhB removal in the different initial RhB concentration. Reaction conditions:  $[\text{Co(OH)}_2/\text{g-C}_3\text{N}_4]_0 = 0.15 \text{ g/L}$ ,  $[\text{PMS}]_0 = 0.5 \text{ g/L}$ , initial  $\text{pH} = 7$ .

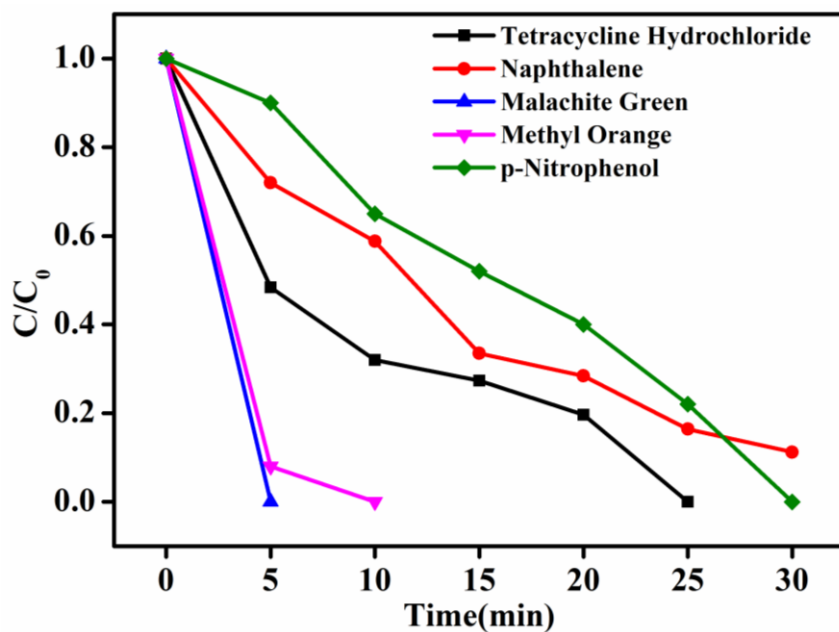

Figure S9. The degradation of various emerging organic pollutants. Reaction conditions:  $V = 100$  mL,  $[\text{organic compounds}]_0 = 20.0$  mg/L,  $[\text{Co(OH)}_2/\text{g-C}_3\text{N}_4]_0 = 0.15$  g/L,  $[\text{PMS}]_0 = 0.5$  g/L, initial pH = 7.0.

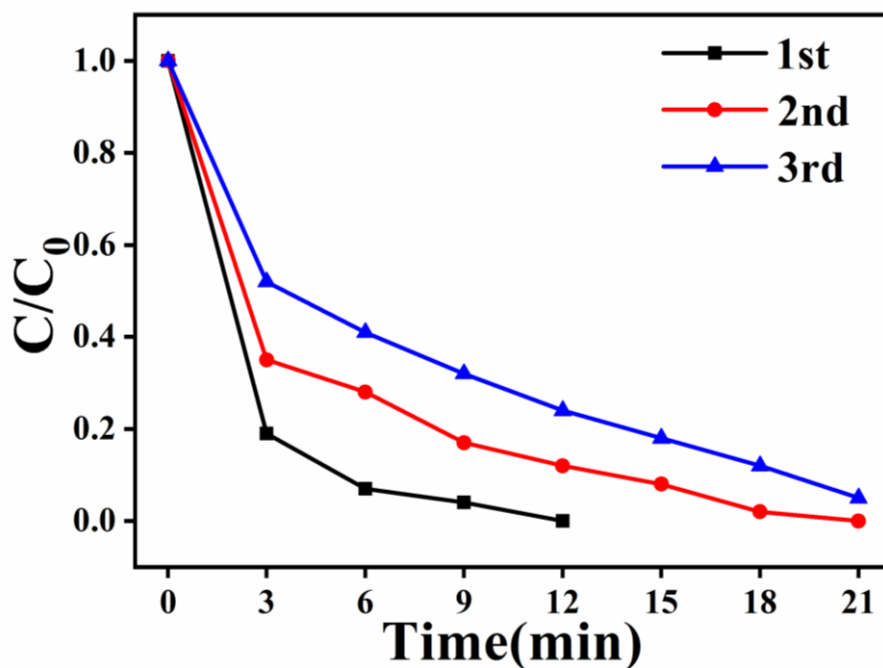

Figure S10. Degradation efficiency of RhB after 3 cycles. Reaction conditions:  $V=100$  mL,  $[\text{organic compounds}]_0 = 20.0$ mg/L,  $[\text{Co(OH)}_2/\text{g-C}_3\text{N}_4]_0 = 0.15$ g/L,  $[\text{PMS}]_0 = 0.5$ g/L, initial pH = 7.



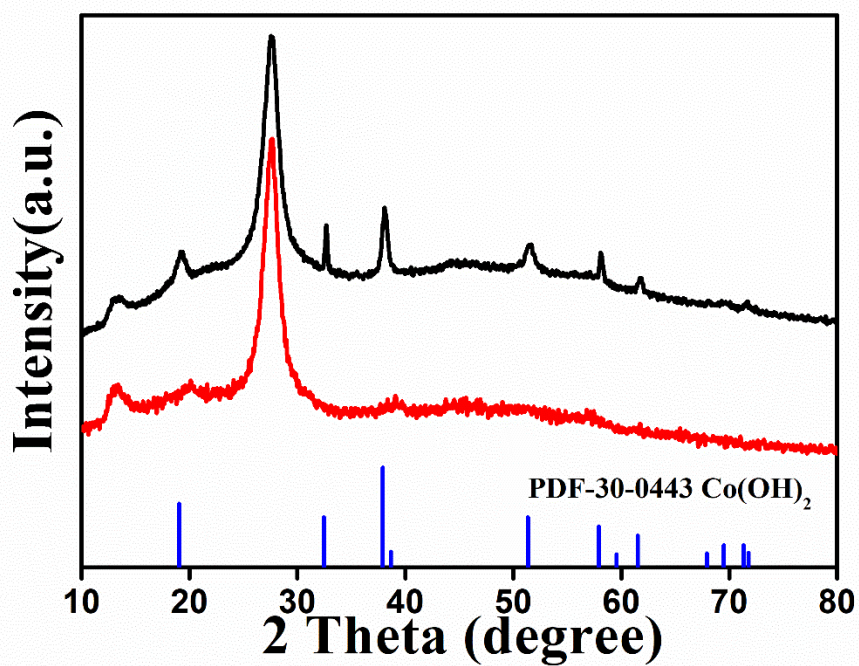

Figure S11. The XRD of Co(OH)<sub>2</sub>/g-C<sub>3</sub>N<sub>4</sub> after using PMS activation.

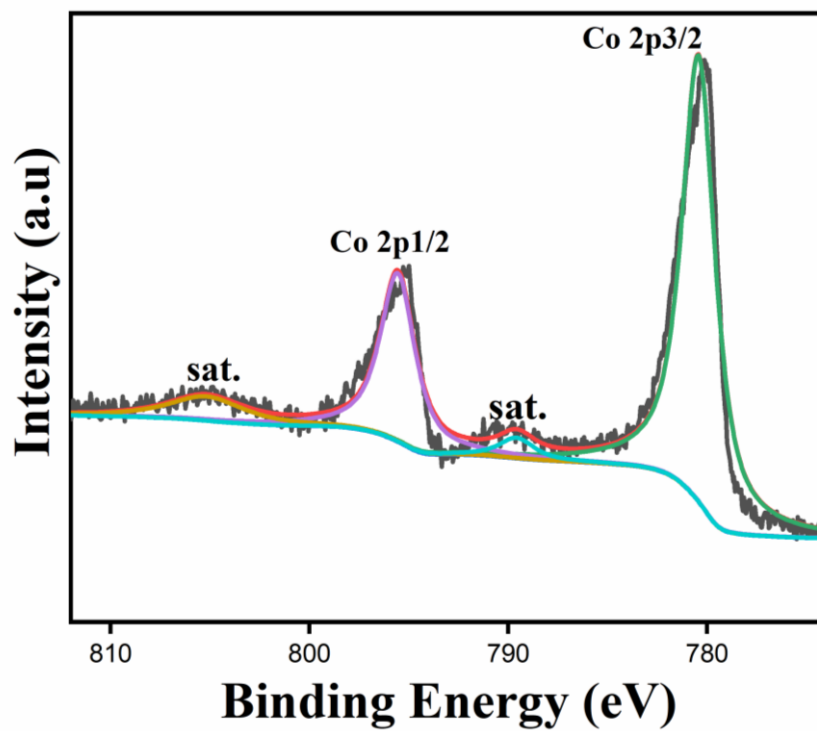

Figure S12. XPS of Co 2p for Co(OH)<sub>2</sub>/g-C<sub>3</sub>N<sub>4</sub> after using PMS activation.

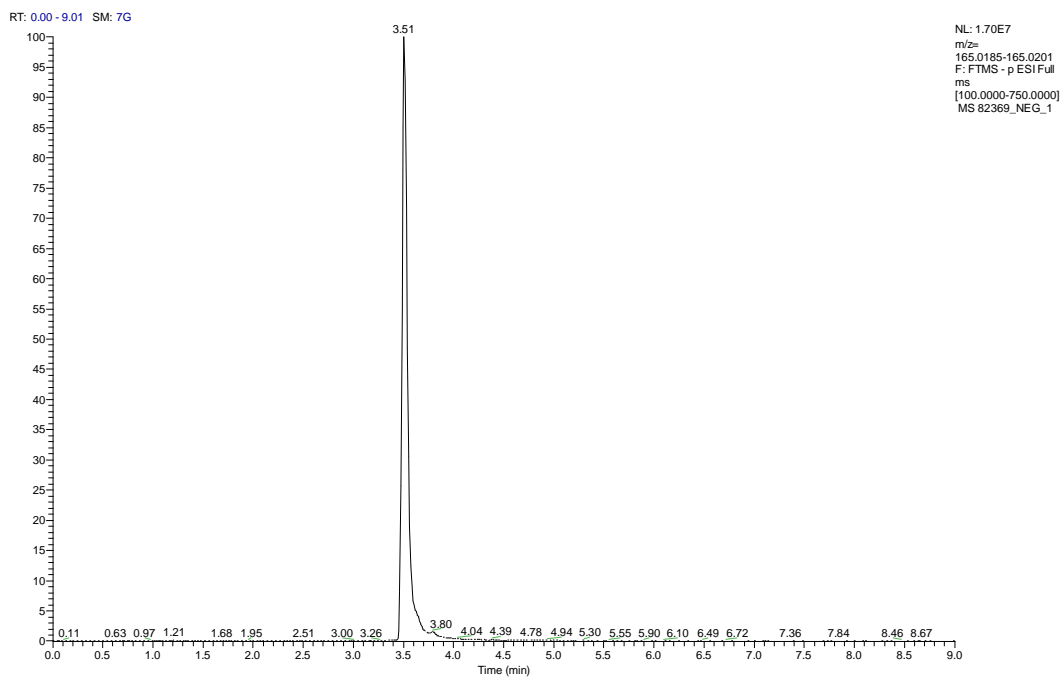

**Figure S13. The extracted ion chromatography (EIC) of phthalic acid.**

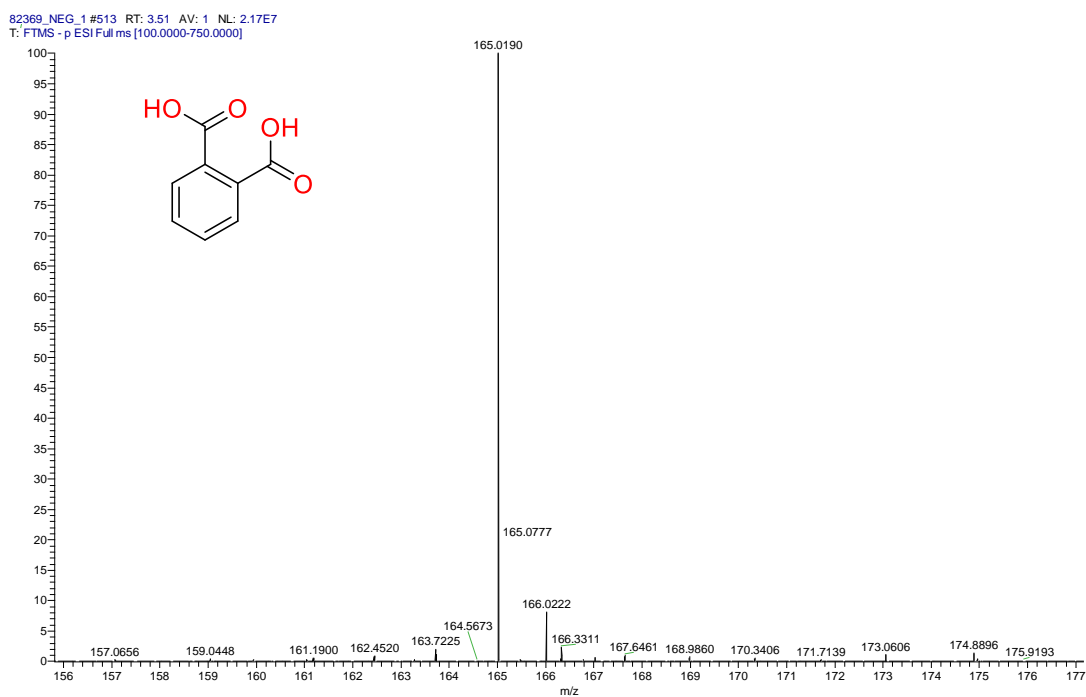

**Figure S14. The mass spectrogram of phthalic acid.**

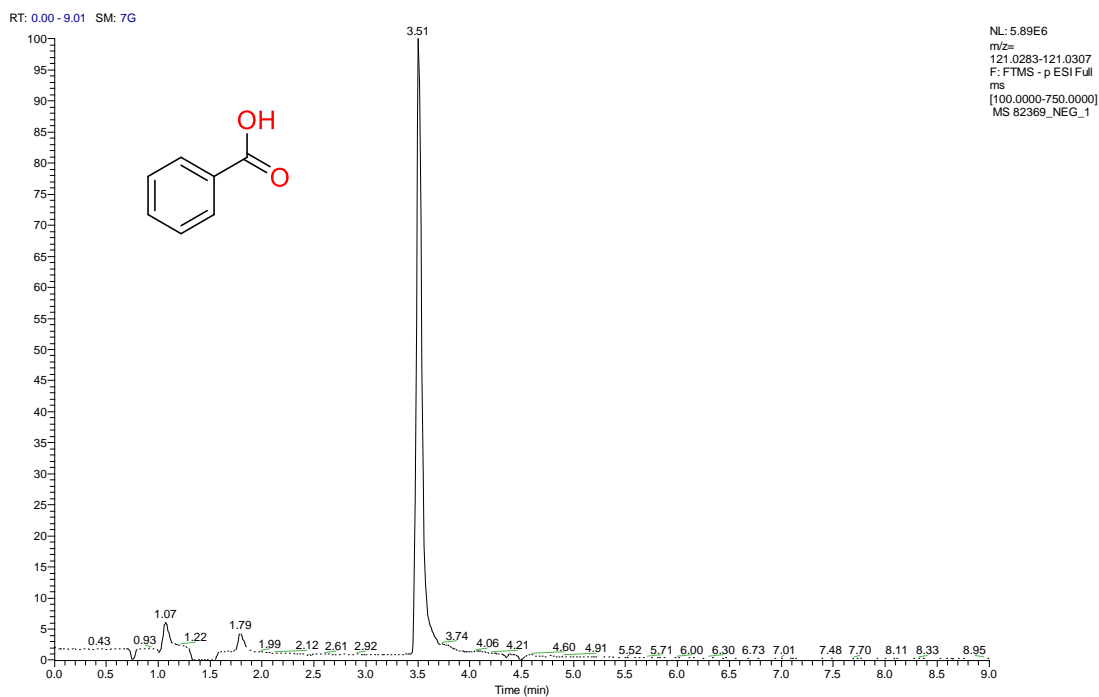

**Figure S15. The extracted ion chromatography (EIC) of phthalic acid.**

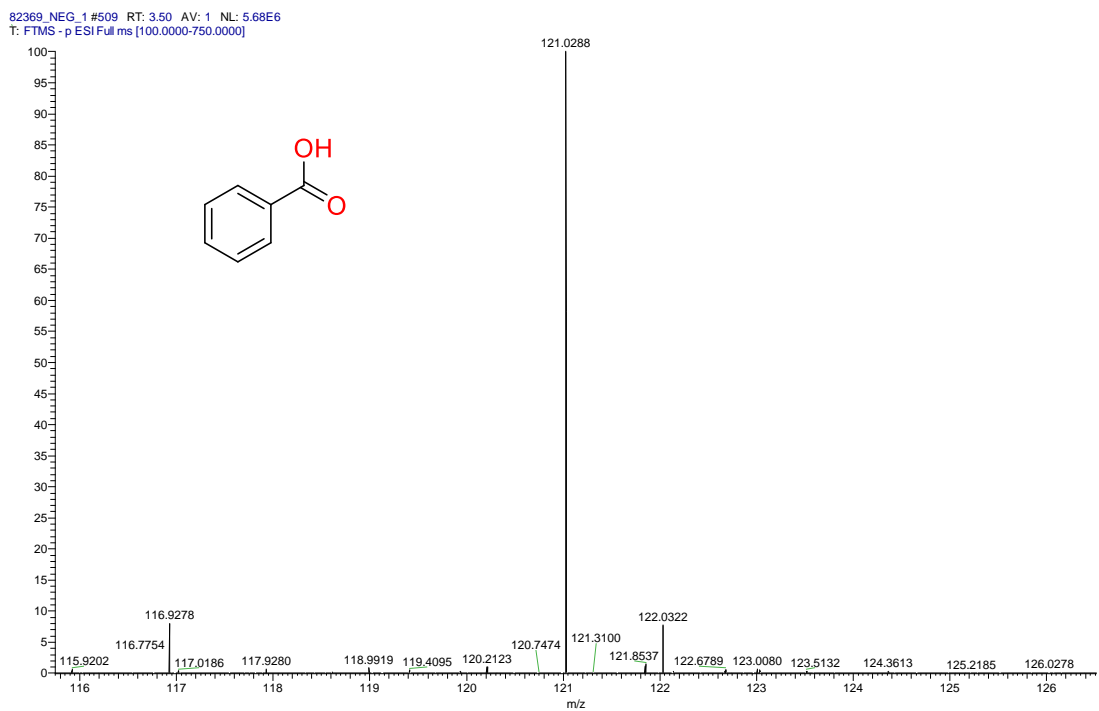

**Figure S16. The mass spectrogram of phthalic acid.**

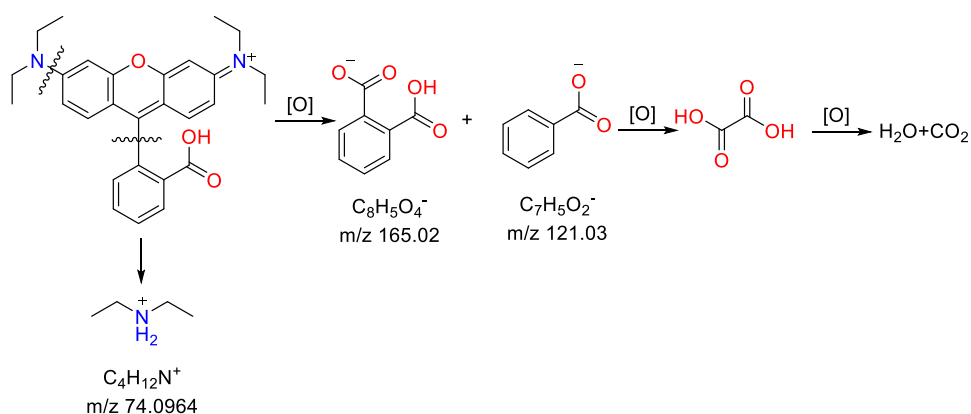

**Figure S17.** The intermediates obtained by liquid mass spectrometry.

**Table S2. Comparison of  $Co(OH)_2/g-C_3N_4$  with other published materials for PMS activation.**

| Contaminants           |             | Catalyst                              |             | PMS                              | $K_{obs}$      | Ref.             |
|------------------------|-------------|---------------------------------------|-------------|----------------------------------|----------------|------------------|
| Type and concentration |             | Type and concentration                |             | Concentration                    | ( $min^{-1}$ ) |                  |
| ( $g L^{-1}$ )         |             | ( $g L^{-1}$ )                        |             |                                  |                |                  |
| RhB                    | 0.1         | $CoFe_2O_4/TNTs$                      | 0.20        | $4.0 g L^{-1}$                   | 0.0673         | [1]              |
| RhB                    | 0.1         | $CoFe_2O_4/OMC$                       | 0.05        | 1.5 mM                           | 0.0452         | [2]              |
| RhB                    | 0.05        | $CoFe_2O_4/diatomite$                 | 0.03        | 1.5 mM                           | 0.572          | [3]              |
| RhB                    | 0.01        | $Mn_3O_4/ZIF-8$                       | 0.40        | $0.3 g L^{-1}$                   | 0.913          | [4]              |
| MB                     | 0.02        | $FeCo_2@APCFs$                        | 0.10        | $0.5 g L^{-1}$                   | 0.422          | [5]              |
| MB                     | 0.02        | $MnFe_2O_4-rGO$                       | 0.05        | $0.5 g L^{-1}$                   | 0.019          | [6]              |
| MB                     | 0.02        | $MnFe_2O_4$                           | 0.05        | $0.5 g L^{-1}$                   | 0.012          | [6]              |
| <b>MB</b>              | <b>0.02</b> | <b><math>Co(OH)_2/g-C_3N_4</math></b> | <b>0.15</b> | <b><math>0.5 g L^{-1}</math></b> | <b>0.524</b>   | <b>This work</b> |
| <b>RhB</b>             | <b>0.02</b> | <b><math>Co(OH)_2/g-C_3N_4</math></b> | <b>0.15</b> | <b><math>0.5 g L^{-1}</math></b> | <b>0.460</b>   | <b>This work</b> |

## Reference

[1] Y. Du, W. Ma, P. Liu, B. Zou, J. Ma, Magnetic  $CoFe_2O_4$  nanoparticles supported on titanate nanotubes ( $CoFe_2O_4/TNTs$ ) as a novel heterogeneous catalyst for peroxymonosulfate activation and degradation of organic pollutants, *J Hazard Mater*, 308 (2016) 58-66.

[2] J. Deng, Y.J. Chen, Y.A. Lu, X.Y. Ma, S.F. Feng, N. Gao, J. Li, Synthesis of

magnetic  $\text{CoFe}_2\text{O}_4$ /ordered mesoporous carbon nanocomposites and application in Fenton-like oxidation of rhodamine B, *Environ Sci Pollut Res Int*, 24 (2017) 14396-14408.

[3] Y. Wang, Y. Zhang, J. Wang, Nano spinel  $\text{CoFe}_2\text{O}_4$  deposited diatomite catalytic separation membrane for efficiently cleaning wastewater, *Journal of Membrane Science*, 615 (2020).

[4] L. Hu, G. Deng, W. Lu, Y. Lu, Y. Zhang, Peroxymonosulfate activation by  $\text{Mn}_3\text{O}_4$ /metal-organic framework for degradation of refractory aqueous organic pollutant rhodamine B, *Chinese Journal of Catalysis*, 38 (2017) 1360-1372.

[5] Z. Zhu, C. Ji, L. Zhong, S. Liu, F. Cui, H. Sun, W. Wang, Magnetic Fe–Co crystal doped hierarchical porous carbon fibers for removal of organic pollutants, *Journal of Materials Chemistry A*, 5 (2017) 18071-18080.

[6] Y. Yao, Y. Cai, F. Lu, F. Wei, X. Wang, S. Wang, Magnetic recoverable  $\text{MnFe}_2\text{O}_4$  and  $\text{MnFe}_2\text{O}_4$ -graphene hybrid as heterogeneous catalysts of peroxymonosulfate activation for efficient degradation of aqueous organic pollutants, *J Hazard Mater*, 270 (2014) 61-70.
